# Supplementary material
Source: publisher figshare collection journal article supplement (https://sage.figshare.com/ndownloader/files/19965392)
Supplement: Supplementary file 1 [file 19965392]

## Code Book

*Version 2.1 – 25 March 2019*

This codebook accompanies replication data for:

Judicial Public Relations: Press Release Publication by Constitutional Courts.

| Variable name            | Variable description                                                                                                                                                                                    |
|--------------------------|---------------------------------------------------------------------------------------------------------------------------------------------------------------------------------------------------------|
| document_id              | Identification number court decision<br>(date[yyyymmdd]_docketnumber)                                                                                                                                   |
| decision_year            | Year of court decision                                                                                                                                                                                  |
| decision_date            | Date of court decision                                                                                                                                                                                  |
| docket_number            | Docket number of court decision                                                                                                                                                                         |
| decision_text            | Full text of court decision                                                                                                                                                                             |
| decision_shorttext       | Short text of court decision, covering the general topic                                                                                                                                                |
| pressrelease_publication | Existence of a decision-related press release: Is a press release published in the context of the respective decision?<br><ul style="list-style-type: none"> <li>▪ yes (1)</li> <li>▪ no (0)</li> </ul> |
| pressrelease_date        | Date of the decision-related press release                                                                                                                                                              |
| pressrelease_number      | Number of the press release (internal sequence number/year)                                                                                                                                             |
| dissenting_opinion       | Existence of a dissenting opinion: Is the respective decision accompanied with a dissenting opinion?<br><ul style="list-style-type: none"> <li>▪ yes (1)</li> <li>▪ no (0)</li> </ul>                   |
| oral_hearing             | Existence of an oral hearing: Was an oral hearing held in the context of the respective decisions?<br><ul style="list-style-type: none"> <li>▪ yes (1)</li> <li>▪ no (0)</li> </ul>                     |
| statusquo_change         | Existence of a status quo change: Is the Court invalidating a statute with the respective decision?<br><ul style="list-style-type: none"> <li>▪ yes (1)</li> <li>▪ no (0)</li> </ul>                    |
| lower_court_overruling   | Existence of a lower court overruling: Does the Court overrules a lower court decision?<br><ul style="list-style-type: none"> <li>▪ yes (1)</li> <li>▪ no (0)</li> </ul>                                |
| abstract_review          | Existence of an abstract review: Is the respective decision concerned with an abstract review (BvF)?<br><ul style="list-style-type: none"> <li>▪ yes (1)</li> <li>▪ no (0)</li> </ul>                   |

|                          |                                                                                                                                                                                                                                         |
|--------------------------|-----------------------------------------------------------------------------------------------------------------------------------------------------------------------------------------------------------------------------------------|
| concrete_review          | Existence of a concrete review: Is the respective decision concerned with a concrete review (BvL)?<br><ul style="list-style-type: none"> <li>▪ yes (1)</li> <li>▪ no (0)</li> </ul>                                                     |
| constitutional_complaint | Existence of a constitution complaint: Is the respective decision concerned with a constitutional complaint (BvR)?<br><ul style="list-style-type: none"> <li>▪ yes (1)</li> <li>▪ no (0)</li> </ul>                                     |
| dispute_federalorgans    | Existence of a dispute between federal organs: Is the respective decision concerned with a dispute between federal organs (BvE)?<br><ul style="list-style-type: none"> <li>▪ yes (1)</li> <li>▪ no (0)</li> </ul>                       |
| dispute_federation_land  | Existence of a dispute between the federation and a land: Is the respective decision concerned with a dispute between the federation and a land (BvE)?<br><ul style="list-style-type: none"> <li>▪ yes (1)</li> <li>▪ no (0)</li> </ul> |
| second_senate            | Deciding court branch: Is the second senate the deciding court branch for the respective decision?<br><ul style="list-style-type: none"> <li>▪ yes (1)</li> <li>▪ no (0)</li> </ul>                                                     |
| judgment                 | Decision type: Is the respective decision a judgment rather and not an order?<br><ul style="list-style-type: none"> <li>▪ yes (1)</li> <li>▪ no (0)</li> </ul>                                                                          |
| decision_length          | Word count of court decision.                                                                                                                                                                                                           |
